# Supplementary material for: Mechanochemical synthesis of novel rutile-type high entropy fluorides for electrocatalysis
Source: Royal Society of Chemistry journal article supplement (doi:10.1039/d0ta10209a), 2021-01-01
Supplement: d0ta10209a1.pdf [file d0ta10209a1.pdf]

## Supporting Information

### Mechanochemical Synthesis of Novel Rutile-Type High Entropy Fluorides for Electrocatalysis

Parvathy Anitha Sukkurji<sup>1, #</sup>, Yanyan Cui<sup>1, #</sup>, Seunghwa Lee<sup>2</sup>, Kai Wang<sup>1</sup>, Raheleh Azmi<sup>3</sup>, Abhishek Sarkar<sup>1, 4</sup>, Sylvio Indris<sup>3</sup>, Subramshu S. Bhattacharya<sup>5</sup>, Robert Kruk<sup>1</sup>, Horst Hahn<sup>1, 4</sup>, Qingsong Wang<sup>1, \*</sup>, Miriam Botros<sup>1, \*</sup> and Ben Breitung<sup>1, \*</sup>

<sup>1</sup>*Institute of Nanotechnology, Karlsruhe Institute of Technology (KIT), Hermann-von-Helmholtz-Platz 1, 76344 Eggenstein Leopoldshafen, Germany*  
E-mail: [qingsong.wang@kit.edu](mailto:qingsong.wang@kit.edu), [miriam.botros@kit.edu](mailto:miriam.botros@kit.edu), [ben.breitung@kit.edu](mailto:ben.breitung@kit.edu)

<sup>2</sup>*Laboratory of Inorganic Synthesis and Catalysis, Institute of Chemical Sciences and Engineering, École Polytechnique Fédérale de Lausanne (EPFL), ISIC-LSCI, 1015 Lausanne, Switzerland*

<sup>3</sup>*Institute for Applied Materials–Energy Storage Systems, Karlsruhe Institute of Technology (KIT), Hermann-von-Helmholtz-Platz 1, Eggenstein-Leopoldshafen 76344, Germany*

<sup>4</sup>*KIT-TUD Joint Research Laboratory Nanomaterials Institute of Materials Science, Technische Universität Darmstadt (TUD), 64206 Darmstadt, Hessen, Germany*

<sup>5</sup>*Department of Metallurgical and Materials Engineering, Nano Functional Materials Technology Centre (NFMTC), Indian Institute of Technology Madras, Chennai, 600036, India*

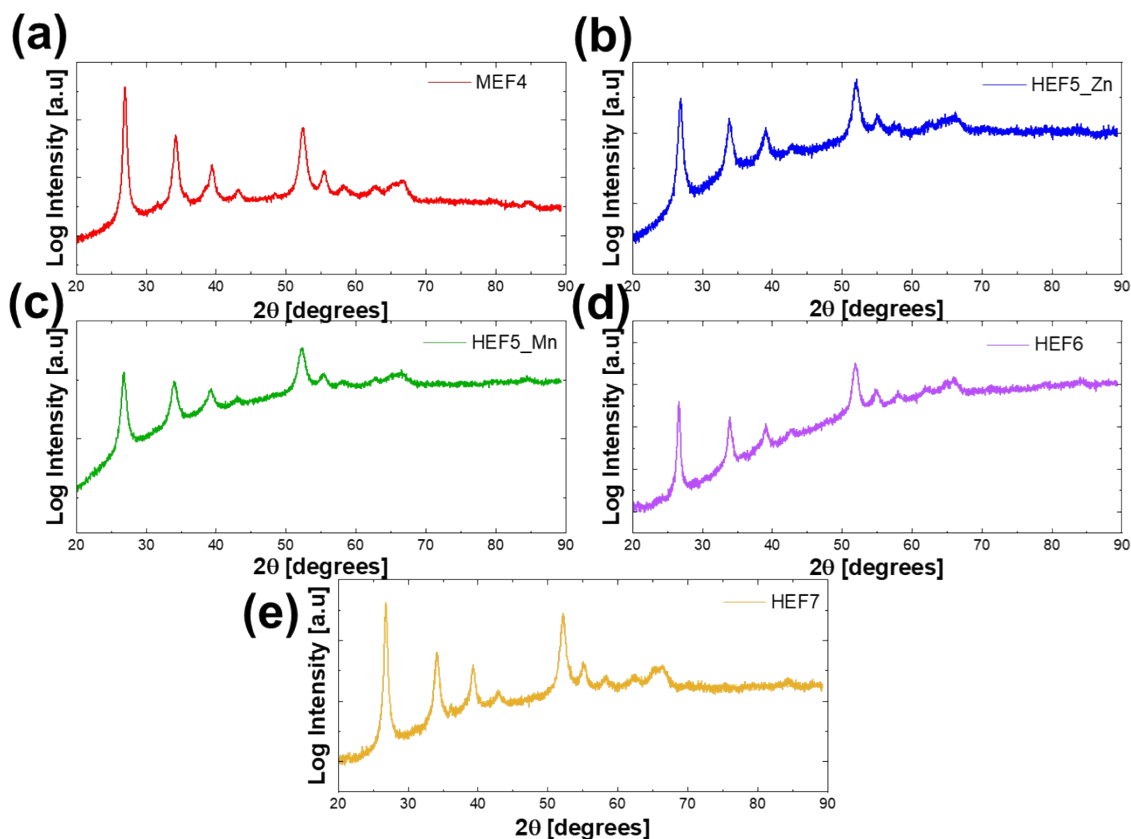

**Figure S1. a) to e)** XRD patterns of MEF and HEF based nanoparticles (MEF4, HEF5\_Zn, HEF5\_Mn, HEF6 and HEF7 respectively) in logarithmic intensity scale. The goodness of fit, Rp and Rwp values are detailed in **Table S3**. In general, all the samples predominantly show the rutile structure.

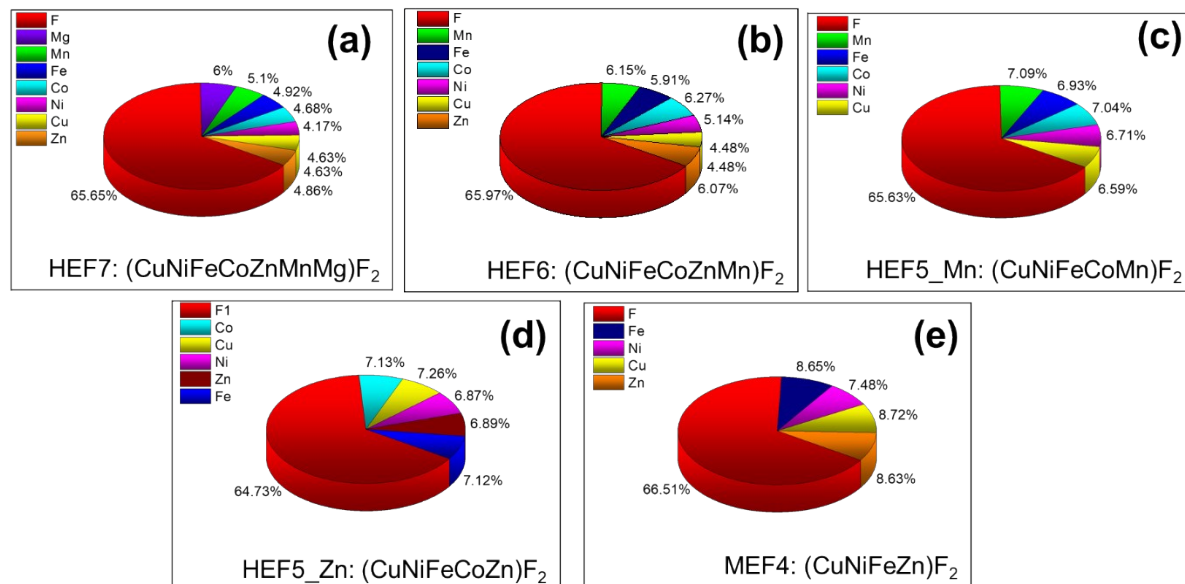

**Fig**

**re S2. a) to e)** Inductively coupled plasma-optical emission spectroscopy (ICP-OES) results of HEF based compounds with variant transition metal cations incorporation (MEF4, HEF5\_Zn, HEF5\_Mn, HEF6 and HEF7). All values are expressed in atomic %.

Configurational entropy values were calculated based on the following equation (S1)

$$S_{config} = -R \left[ \sum_{i=1}^N x_i \ln x_i \right]_{cation-site} + \left[ \sum_{j=1}^M x_j \ln x_j \right]_{anion-site} \quad (S1)$$

(where  $x_i$ ,  $R$ ,  $N$  and  $M$  are the mole fraction of the elements in cationic or anionic sites, Universal gas constant, number of cationic and anionic species respectively)

**Table S1.** Configurational entropy values ( $S_{config}$ ) of the synthesized HEF

| Fluoride type | Compound                                                        | $S_{config}$ value |
|---------------|-----------------------------------------------------------------|--------------------|
| MEF4          | $(Cu_{1/4}Ni_{1/4}Fe_{1/4}Zn_{1/4})F_2$                         | 1.39R              |
| HEF5_Zn       | $(Cu_{1/5}Ni_{1/5}Fe_{1/5}Co_{1/5}Zn_{1/5})F_2$                 | 1.61R              |
| HEF5_Mn       | $(Cu_{1/5}Ni_{1/5}Fe_{1/5}Co_{1/5}Mn_{1/5})F_2$                 | 1.61R              |
| HEF6          | $(Cu_{1/6}Ni_{1/6}Fe_{1/6}Co_{1/6}Zn_{1/6}Mn_{1/6})F_2$         | 1.79R              |
| HEF7          | $(Cu_{1/7}Ni_{1/7}Fe_{1/7}Co_{1/7}Zn_{1/7}Mn_{1/7}Mg_{1/7})F_2$ | 1.95R              |

For every ion, the ionic radius in octahedral coordination (rutile) was taken. For calculating the average ionic radius of the incorporated ions, the ionic radii were simply added and then divided by the number of elements. e.g.  $Zn^{2+} / Ni^{2+} = (0.89\text{Å} + 0.84\text{Å})/2 = 0.87\text{Å}$ . Hence for the case of MEF4, the average ionic radii (values in parenthesis indicate the metal ion) =  $[0.89 (Zn^{2+}) + 0.84 (Ni^{2+}) + 0.91 (Fe^{2+}) + 0.87 (Cu^{2+})]/4 = 0.88\text{Å}$ .

**Table S2.** Crystal structure, lattice constants and expected cation radius of the precursor binary fluorides assuming octahedral coordination.

| Binary Fluorides | Crystal structure | Lattice constant (Å)         | Ionic radius (Å) | References            |
|------------------|-------------------|------------------------------|------------------|-----------------------|
| $CuF_2$          | Monoclinic        | a=3.2973; b=4.5624; c=4.6157 | 0.87             | ICSD#71833            |
| $NiF_2$          | Rutile            | a= b=4.6498 c=3.0838         | 0.84             | ICSD#9168             |
| $FeF_2$          | Rutile            | a= b=4.6945; c=3.3097        | 0.91(H)          | ICSD#9166             |
| $CoF_2$          | Rutile            | a= b=4.6941; c=3.1698        | 0.88 (H)         | ICSD#9167             |
| $ZnF_2$          | Rutile            | a= b=4.7048; c=3.1338        | 0.89             | ICSD#9169             |
| $MnF_2$          | Rutile            | a= b=4.877; c=3.311          | 0.96 (H)         | ICSD#9165             |
| $MgF_2$          | Rutile            | a= b=4.621; c=3.0519         | 0.86             | ICSD#397              |
| HEF7             | Rutile            | a= b=4.7134; c=3.1726        | -                | Calculated<br>(TOPAS) |

\*H = high spin, adapted from<sup>1</sup>

**Table S3.** Refined structural parameters *a*, *b*, *c*, and *V* for MEF and HEF compounds from Rietveld analysis. The quality of refinements *Rwp*, *Rp* and *GOF* are also listed. Rietveld analysis was carried out using reference reflexes from ZnF<sub>2</sub> (ICSD#9169) thereby modifying the type of elements present in refined system and it indicated that all HEF samples possess rutile structure. This finding signified that the complex HEF system followed ideal rule of mixing, wherein equal probability of occupation was found in a random solid solution environment.

| Parameters                 | HEF7    | HEF6    | HEF5_Mn | HEF5_Zn | MEF4    |
|----------------------------|---------|---------|---------|---------|---------|
| <i>a</i> [Å]               | 4.71342 | 4.7288  | 4.6826  | 4.7173  | 4.6911  |
| <i>b</i> [Å]               | 4.71342 | 4.7288  | 4.6826  | 4.7173  | 4.6911  |
| <i>c</i> [Å]               | 3.17260 | 3.1823  | 3.1708  | 3.2089  | 3.1699  |
| <i>V</i> [Å <sup>3</sup> ] | 70.4834 | 71.1571 | 69.5261 | 71.4082 | 69.7580 |
| <i>Rwp</i>                 | 0.78    | 1.10    | 0.73    | 0.79    | 1.19    |
| <i>Rp</i>                  | 0.73    | 0.87    | 0.63    | 0.63    | 0.92    |
| <i>GOF</i>                 | 1.25    | 1.23    | 1.14    | 1.14    | 1.59    |

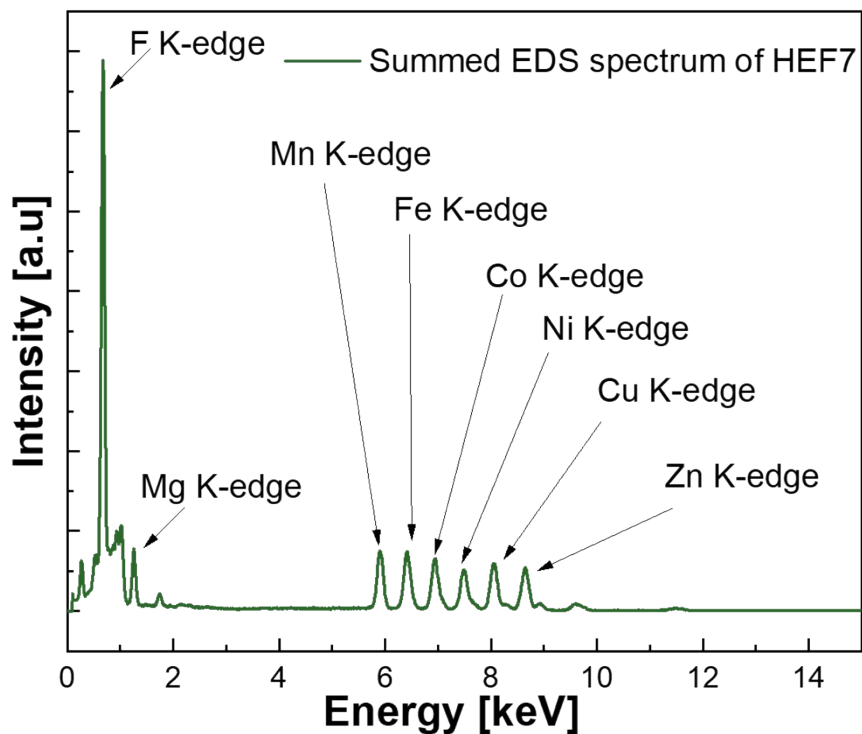

**Figure S3.** STEM based EDS spectrum of the as-prepared HEF7 sample. All the constituent elements in HEF7 sample are detected.

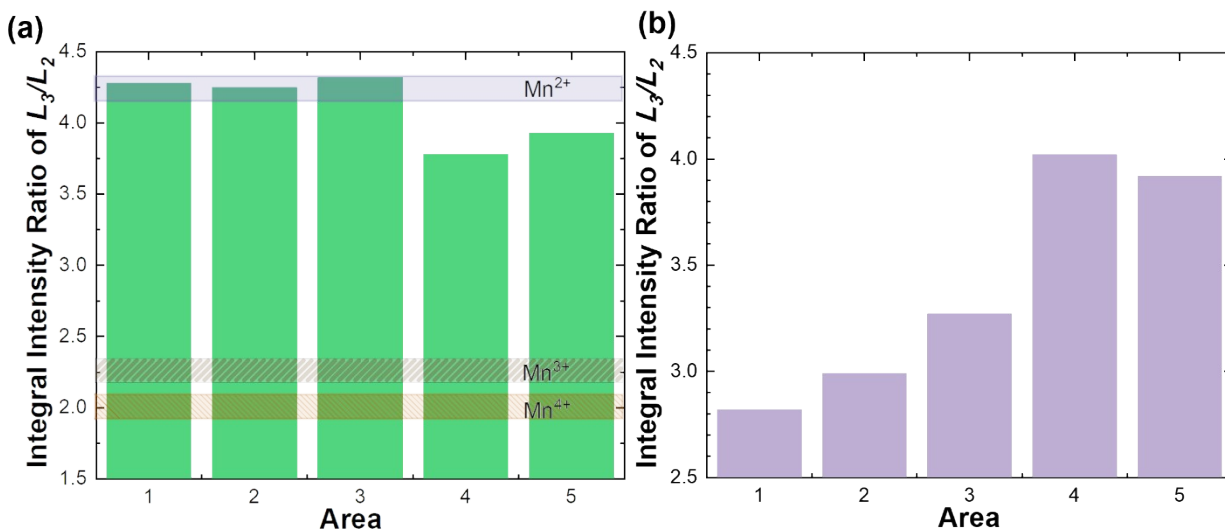

**Figure S4.** Plots of the intensity ratios of  $L_3/L_2$  values of **a)** Mn (values in green colour) and **b)** Fe (values in purple colour) calculated from the spectra obtained from HEF7 nanoparticles as a function of the areal mapping values acquired at different points.

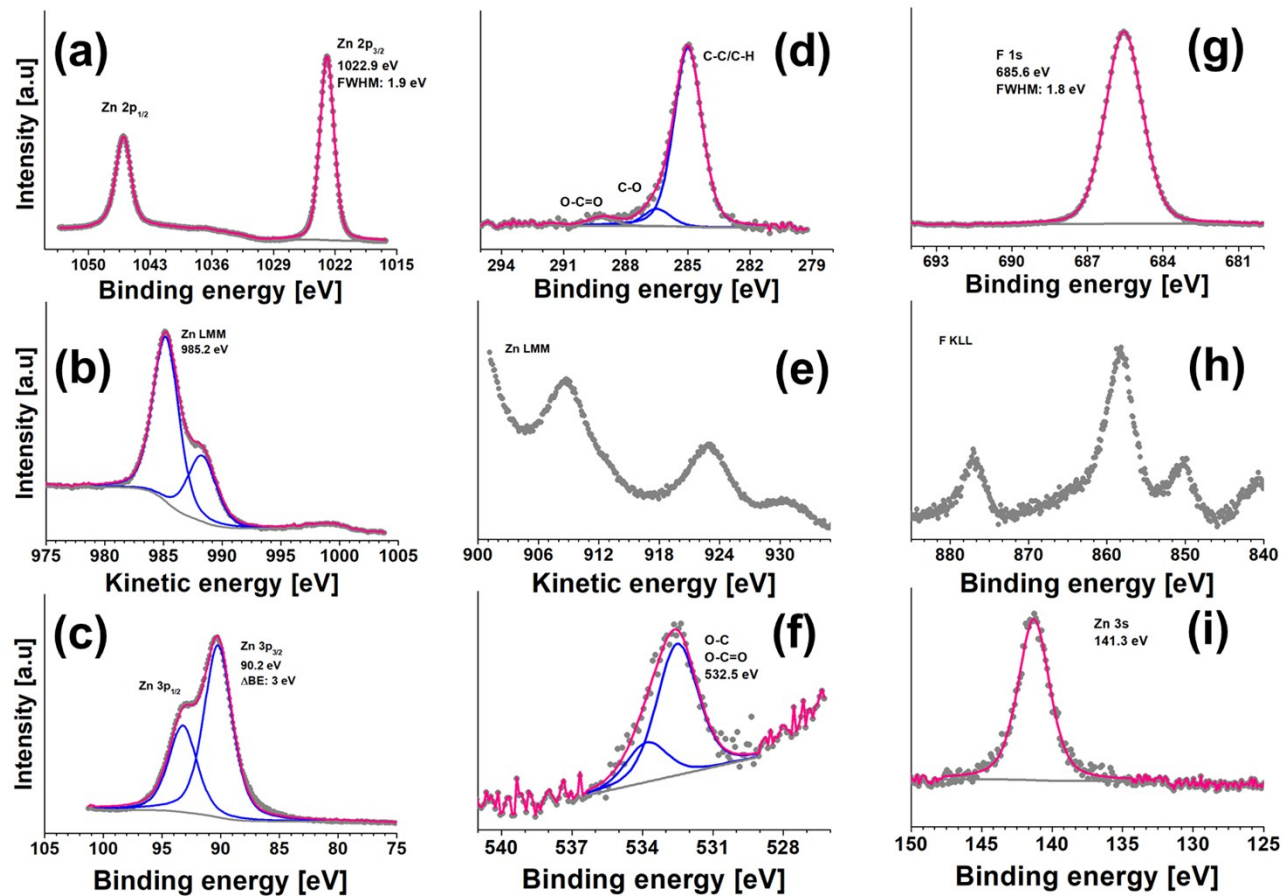

Figure S5. a) Zn 2p, b) Zn LMM, c) Zn 3p, d) C 1s, e) Zn LMM, f) O 1s, g) F 1s, h) F KLL, and i) Zn 3s XPS spectra of ZnF<sub>2</sub> powder.

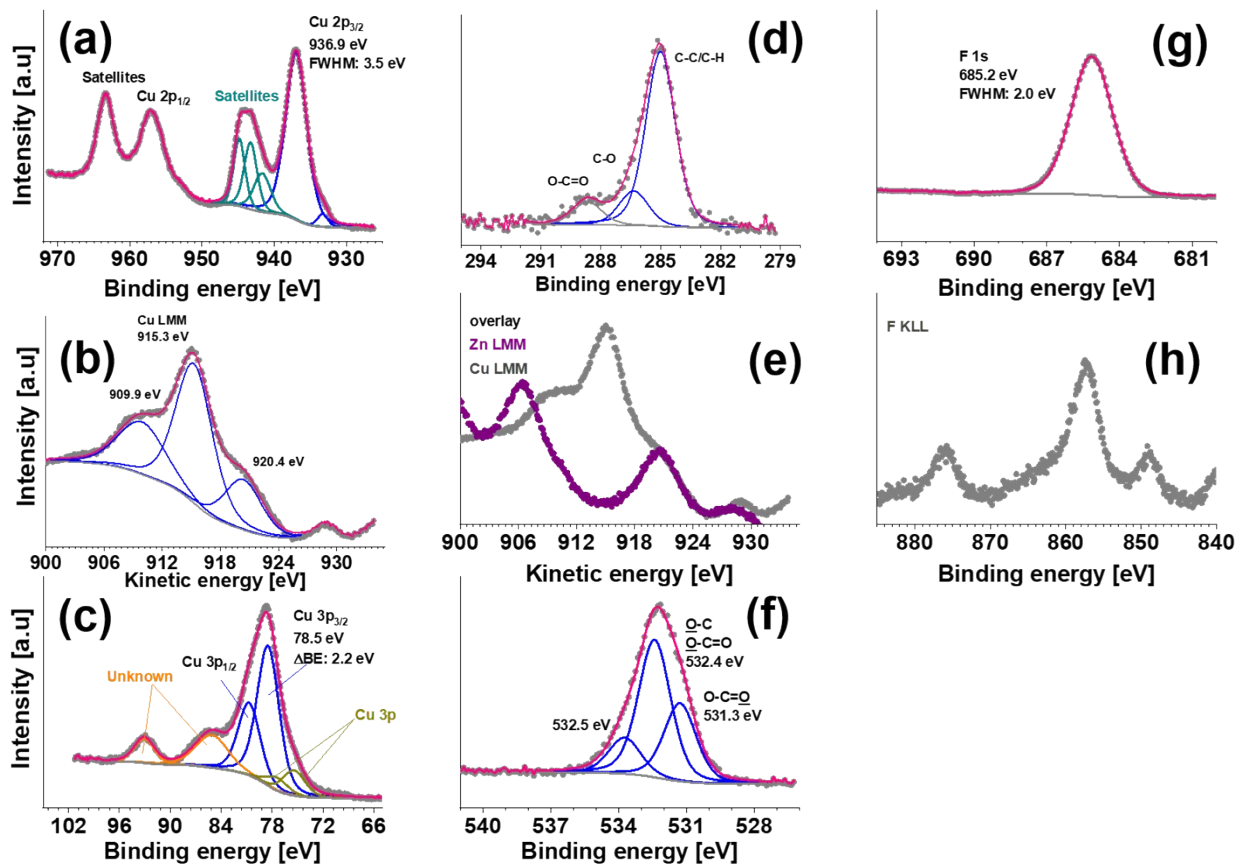

**Figure S6.** a) Cu 2p, b) Cu Auger LMM kinetic energy spectra, c) Cu 3p, d) C 1s, e) overlay plot of Zn LMM and Cu LMM kinetic energy spectra f) O 1s g) F 1s and h) F KLL, XPS spectra of CuF<sub>2</sub> powder (In pure CuF<sub>2</sub> powder, the Cu 2p<sub>3/2</sub> spectrum has a pronounced peak at 936.9 eV with FWHM of 3.5 eV).

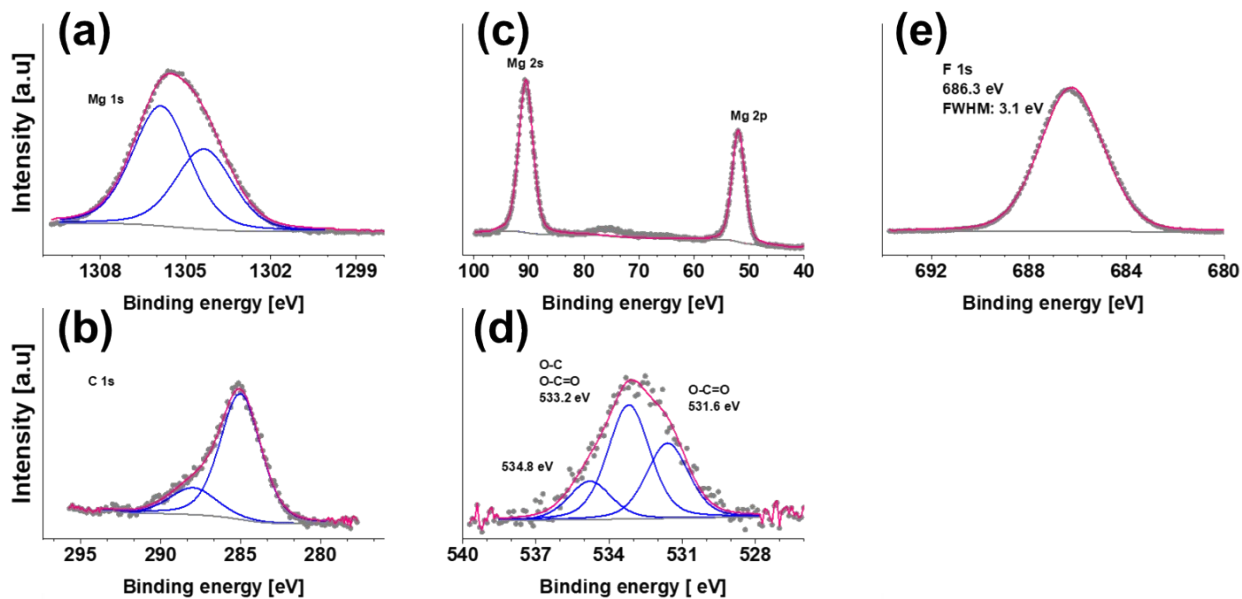

Figure S7. a) Mg 1s, b) C 1s, c) Mg 2p, Mg 2s, d) O 1s and e) F 1s, spectra of MgF<sub>2</sub>. The broadening of C 1s and Mg 1s spectra is because of difficulties of charge compensation.

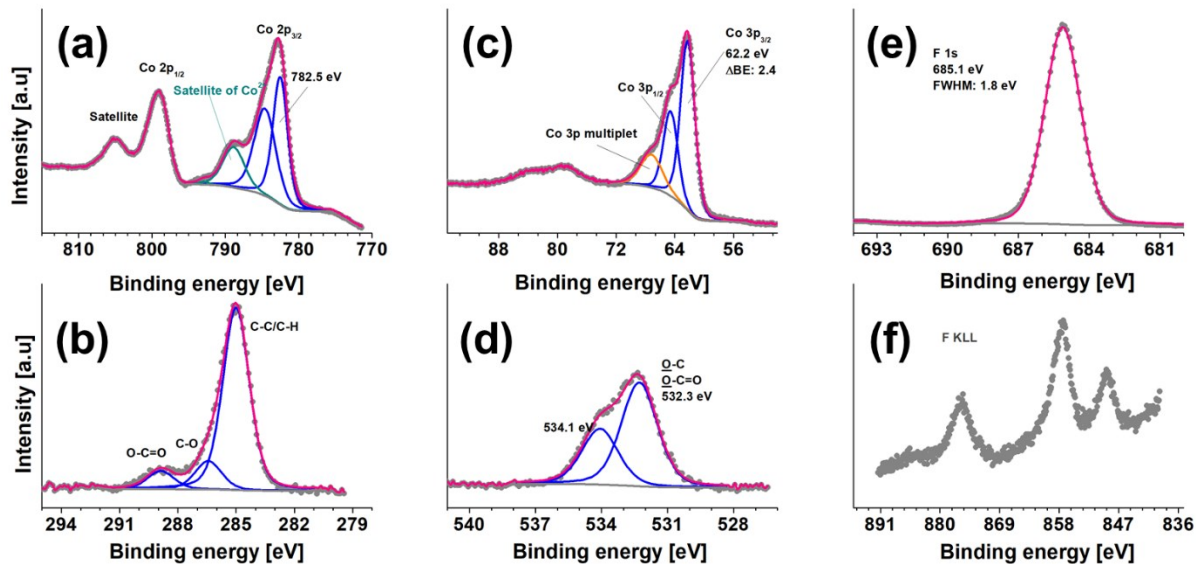

Figure S8. a) Co 2p, b) C 1s, c) Co 3p, d) O 1s e) F 1s, and f) F KLL XPS spectra of CoF<sub>2</sub> powder.



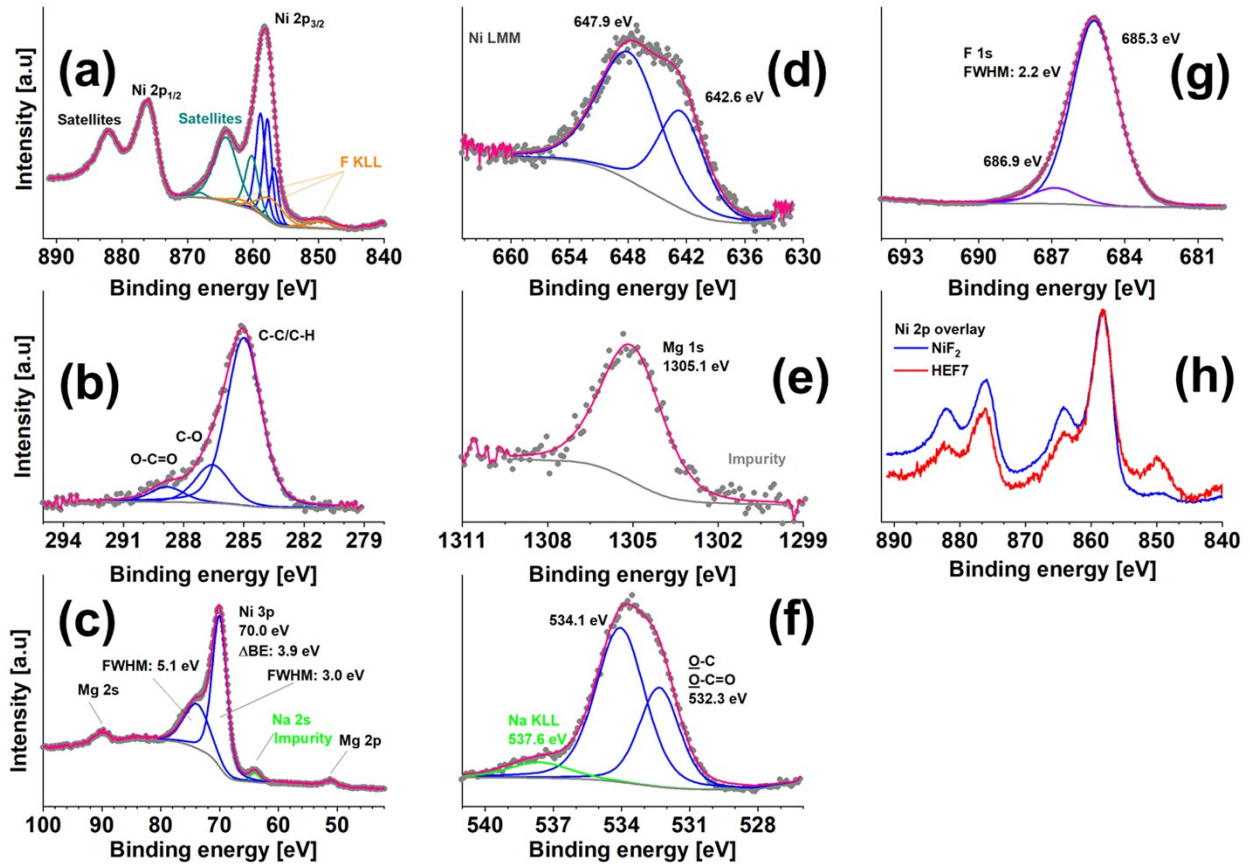

Figure S9. a) Ni 2p, b) C 1s, c) Ni 3p (Mg 1s, Na 2s as impurity), d) Ni LMM, e) Mg 1s, f) O 1s, g) F 1s XPS spectra of NiF<sub>2</sub> powder and h) overlay data of NiF<sub>2</sub> power (with HEF7)

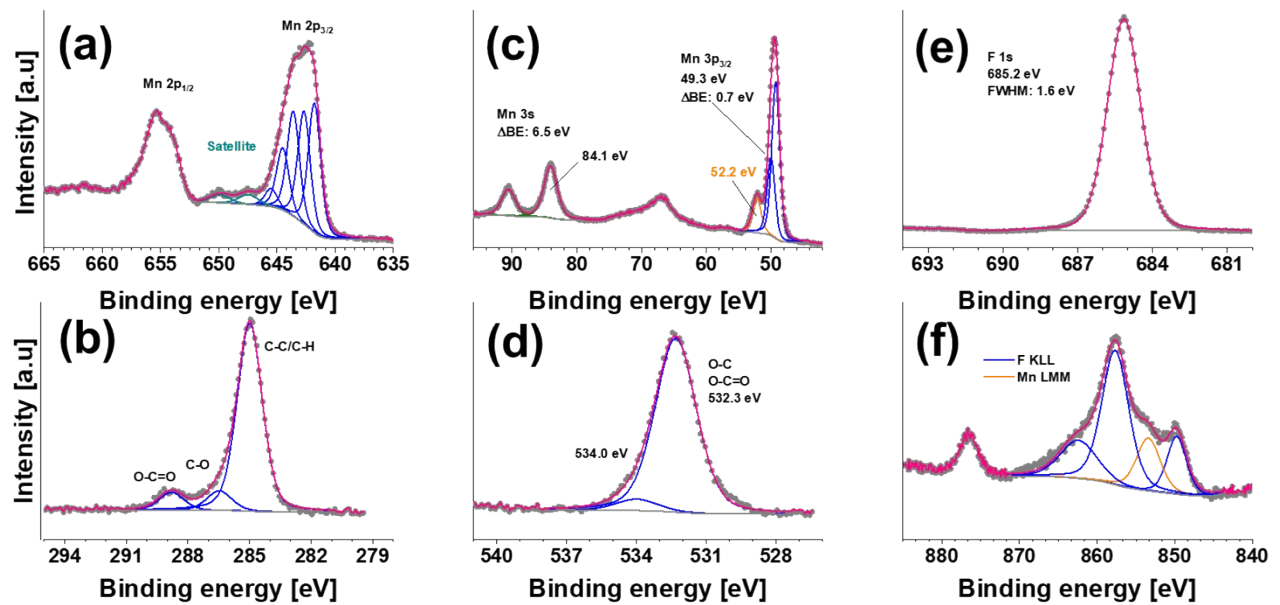

Figure S10. a) Mn 2p, b) C 1s, c) Mn 3p, Mn 3s, d) O 1s, e) F 1s and f) F KLL XPS spectra of MnF<sub>2</sub> powder.

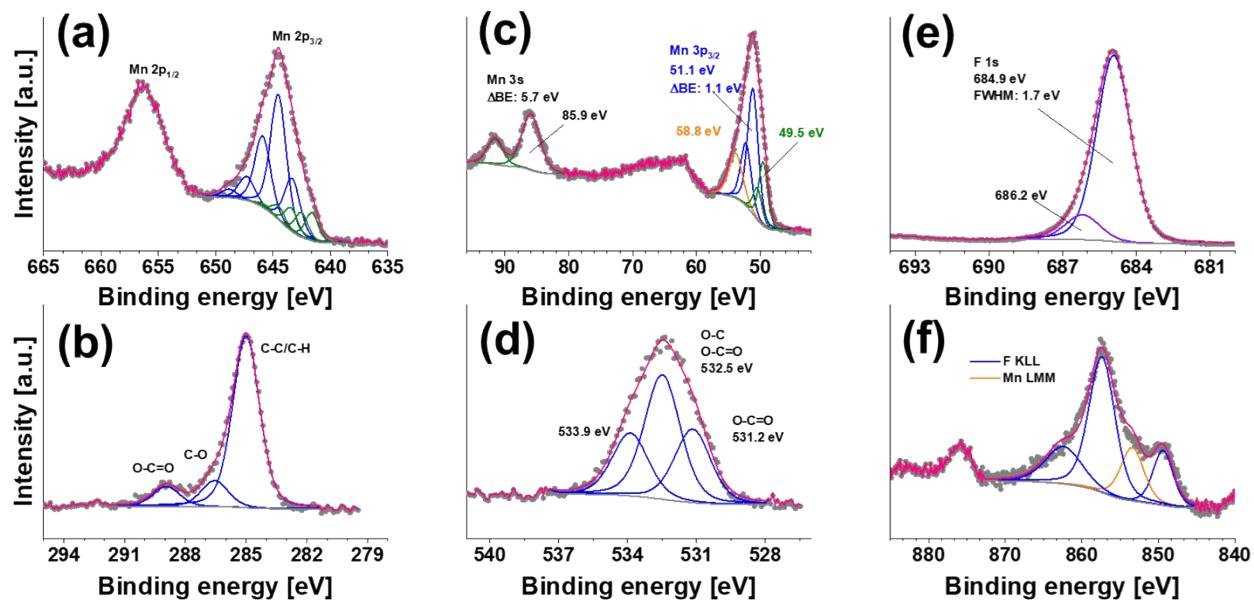

Figure S11. a) Mn 2p, b) C 1s c) Mn 3p, Mn 3s, d) O 1s e) F 1s and f) F KLL XPS spectra of  $\text{MnF}_3$  powder.

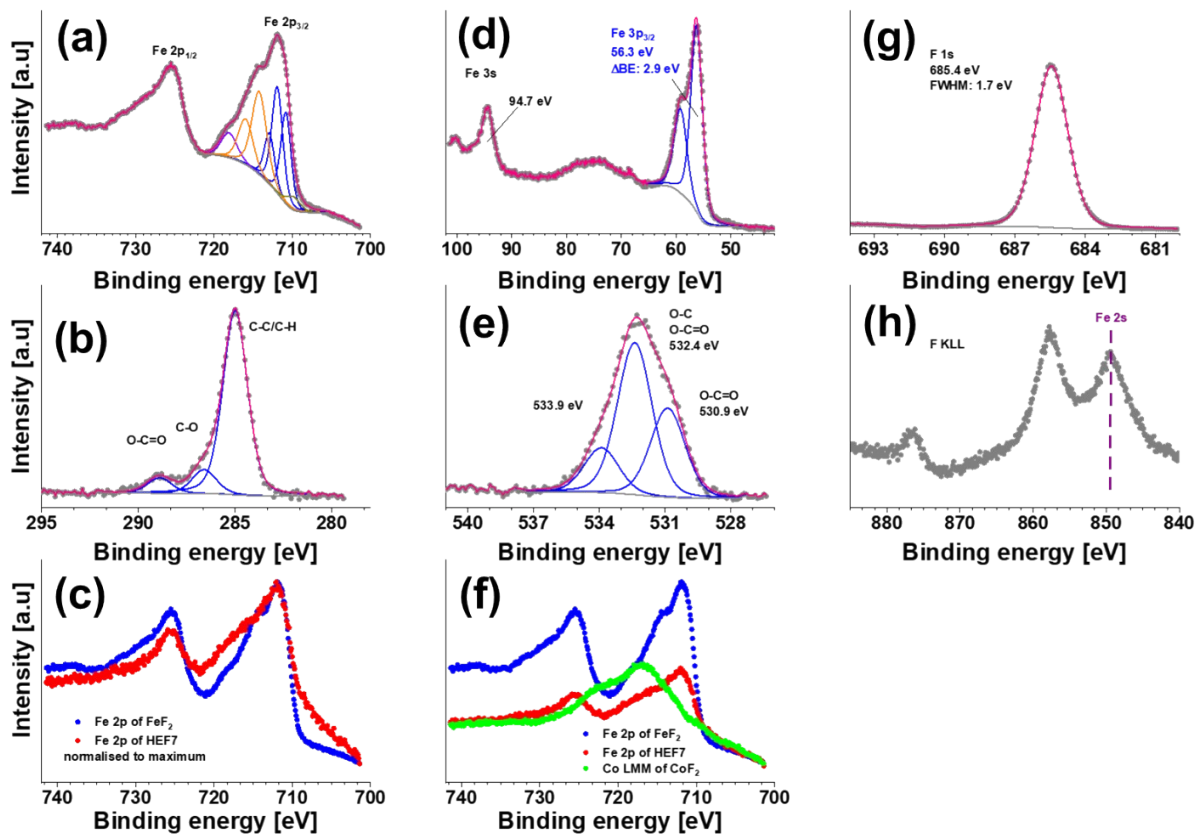

Figure S12. a) Fe 2p, b) C 1s, c) overlay comparison of  $\text{FeF}_2$ , HEF7 d) Fe 3p, Fe 3s e) O 1s, f) overlay comparison of  $\text{FeF}_2$ , HEF7, Co LMM of  $\text{CoF}_2$ , g) F 1s and h) F KLL XPS spectra of  $\text{FeF}_2$  powder.

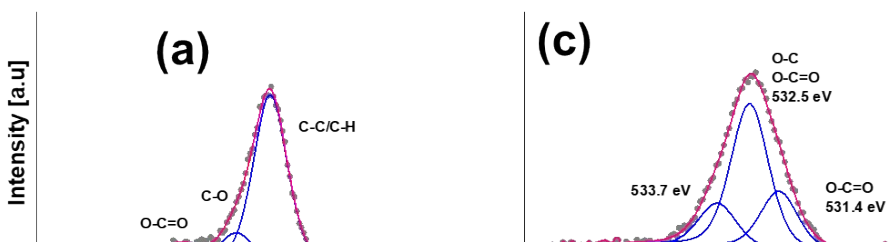

**Figure S13.** a) C 1s, b) overlapping spectra hamper evaluation of Mn 3p and Mn 3s for elucidation of Mn oxidation state c) O 1s and d) Cu LMM XPS spectra of HEF7 nanoparticles.

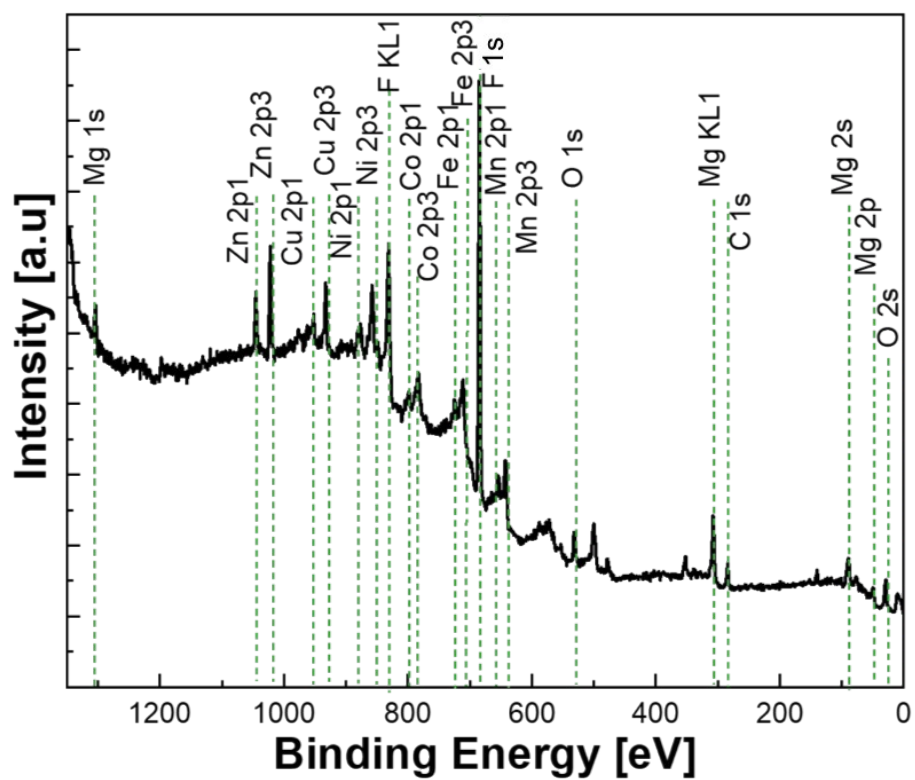

**Figure S14.** Survey scan spectrum of HEF7 nanoparticles.

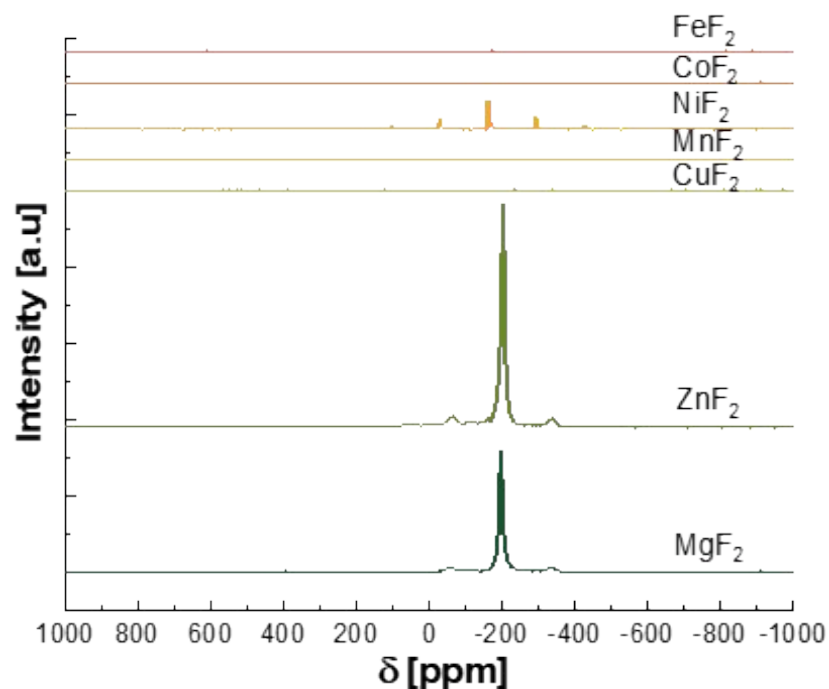

**Figure S15.**  $^{19}\text{F}$ -NMR spectra of the reference binary fluorides used as the precursors for HEF based materials synthesis.

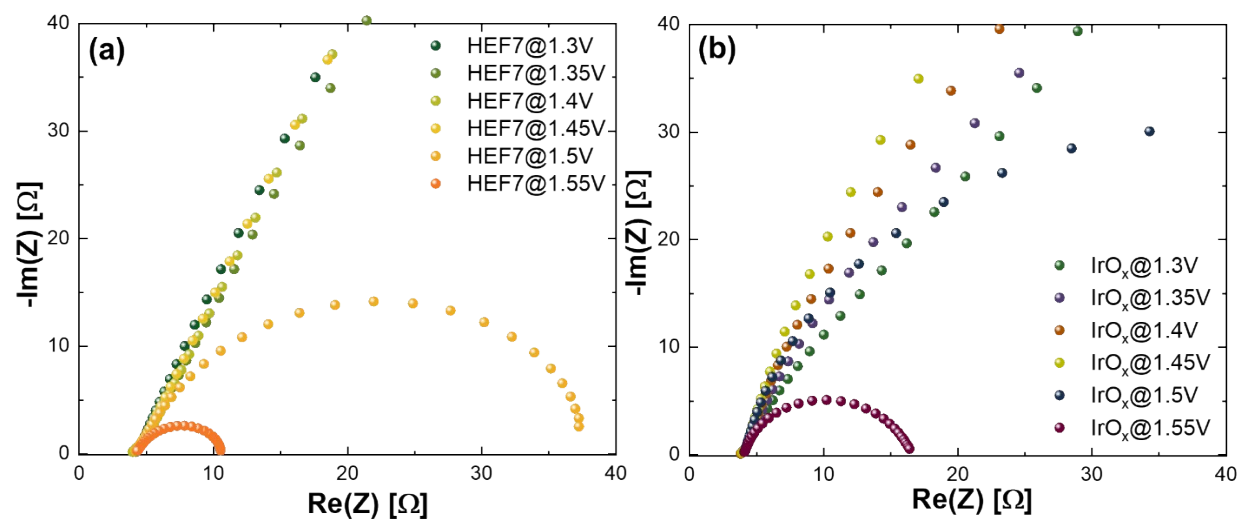

**Figure S16.** Nyquist plots of **a)** HEF7 and **b)**  $\text{IrO}_2$  respectively in 1 M KOH. The EIS response was measured at different applied potentials from 1.3 V to 1.55 V to probe the electrochemical processes.

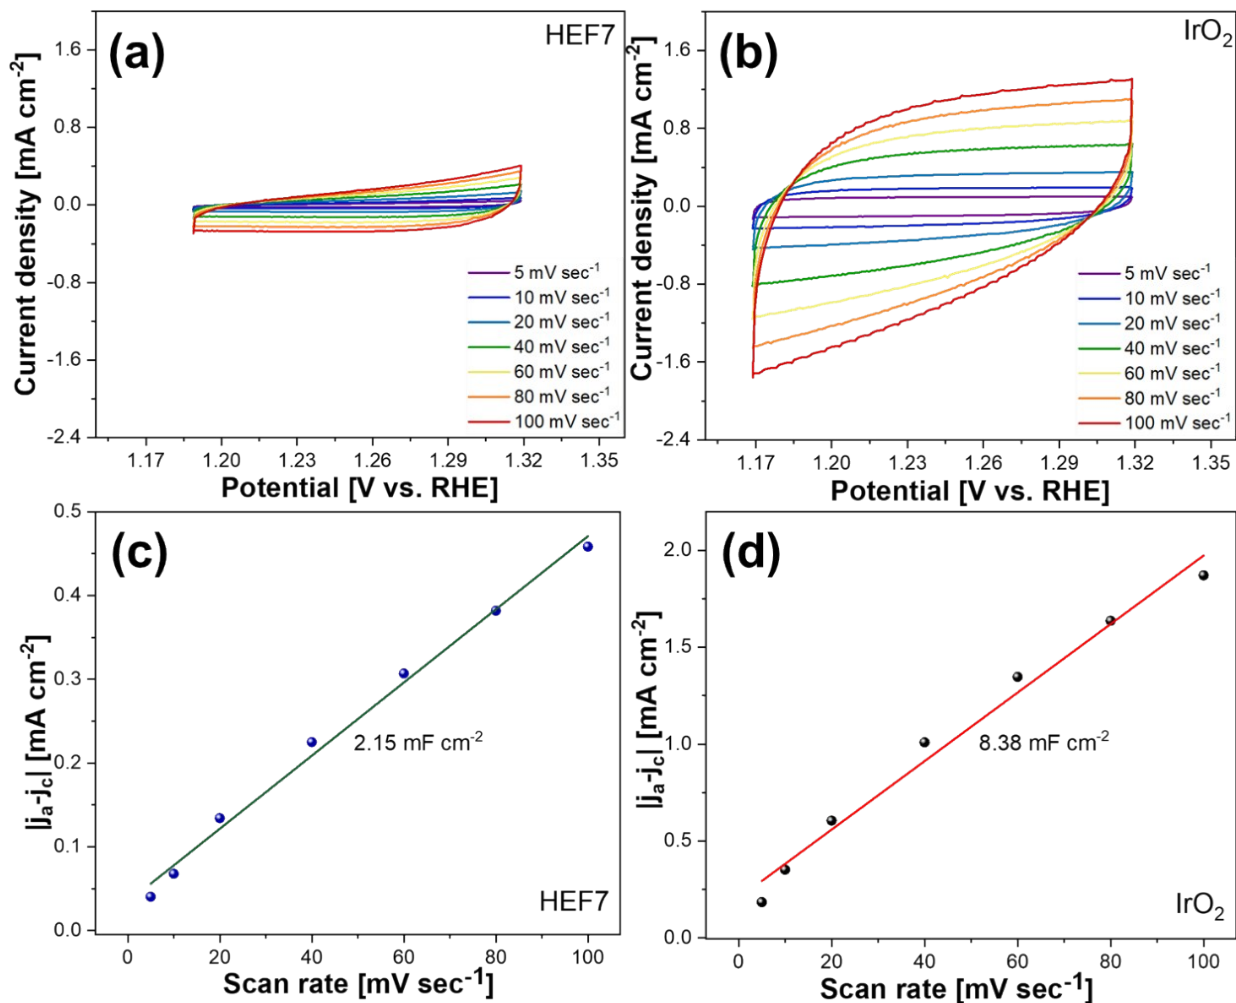

**Figure S17.** Cyclic voltammograms of **a)** HEF and **b)**  $\text{IrO}_2$  measured in 1 M KOH at different scan rates (5, 10, 20, 40, 60, 80, 100  $\text{mV sec}^{-1}$ ) for the determination of the  $C_{dl}$ . Plots of **c)** HEF and **d)**  $\text{IrO}_2$  in terms of the difference of the anodic and cathodic current densities,  $\Delta J = |j_a - j_c|$ , versus the scan rate.

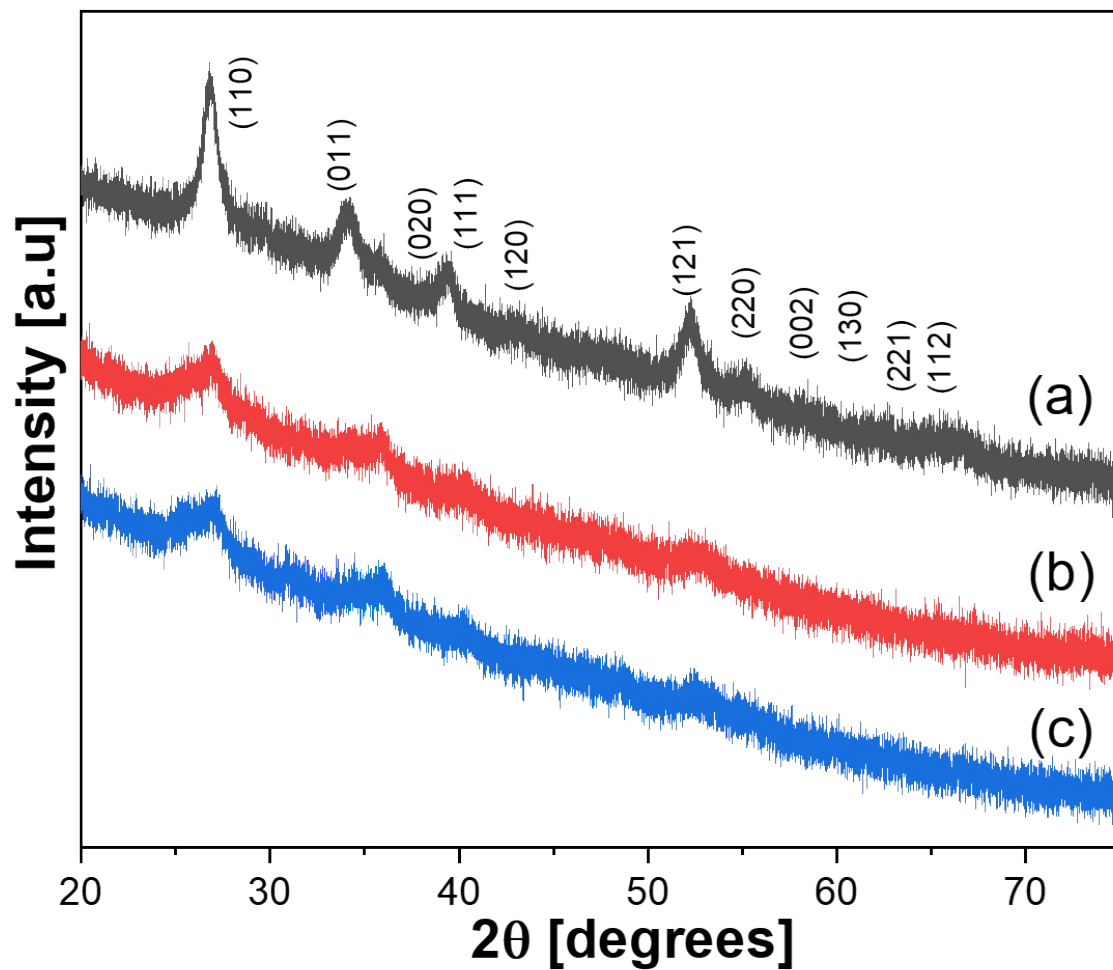

**Figure S18.** XRD patterns of **a)** catalyst ink containing HEF and HEF-deposited carbon cloth electrodes **b)** before and **c)** after 12 h of the electrolysis.

## References

- 1 R. D. Shannon and C. T. Prewitt, *Acta Crystallogr. Sect. B Struct. Crystallogr. Cryst. Chem.*, 1969, **25**, 925–946.
